# Supplementary material
Source: Springer Nature journal article supplement (https://www.springermedizin.de/resource/supplementary/12936_2009_1139_MOESM1_ESM.pdf/9549956)

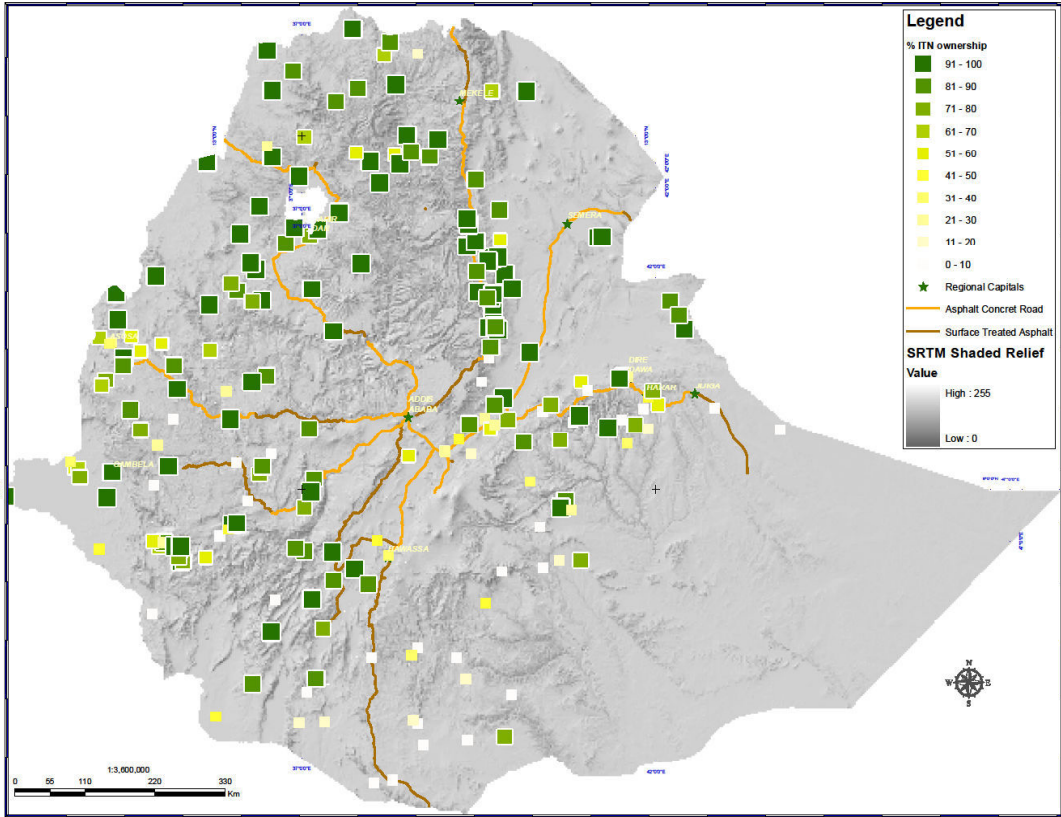

Supplement: MOESM1 [file 9549956]
